# Supplementary material for: Oxidative Stress in Far Eastern Mussel Mytilus trossulus (Gould, 1850) Exposed to Combined Polystyrene Microspheres (µPSs) and CuO-Nanoparticles (CuO-NPs)
Source: MDPI journal article supplement (doi:10.3390/jmse10050707), 2022-05-22
Supplement: s1 [file s1]

Archive with 1 entries (1 files):
- jmse-1719616-supplementary.pdf
