# Supplementary material for: Oxidative Stress in Far Eastern Mussel Mytilus trossulus (Gould, 1850) Exposed to Combined Polystyrene Microspheres (µPSs) and CuO-Nanoparticles (CuO-NPs)
Source: MDPI journal article supplement (doi:10.3390/jmse10050707), 2022-05-22
Supplement: s1 [file s1 › jmse-1719616-supplementary.pdf]

**Table S1.** Quality Assurance/Quality Control assessment, based on de Ruijter et al. (de Ruijter et al. 2020).

| <b>Technical quality assessment</b>                |                                                                                                                                                                                                                                                                        |       |
|----------------------------------------------------|------------------------------------------------------------------------------------------------------------------------------------------------------------------------------------------------------------------------------------------------------------------------|-------|
| Particle characterization                          |                                                                                                                                                                                                                                                                        | Score |
| 1. Particle size and Particle shape                | 0.9 $\mu\text{m}$ microspheres according to manufacturer. Size and shape was confirmed by Carl Zeiss, AxioImager A1, microscope, equipped with a digital camera AxioCam MRc. Results are presented in Figure S1                                                        | 2+2   |
| 3. Polymer type                                    | Polystyrene according to manufacturer. Type of polymer was confirmed by FTIR spectroscopy (IRAffinity-1S, Shimadzu). FTIR spectra was presented in Figure S2.                                                                                                          | 2     |
| 4. Source of NP                                    | Commercial Tianjin BaseLine ChromTech Research Centre (China)                                                                                                                                                                                                          | 2     |
| 5. Data reporting                                  | PS NPs concentrations in this study were reported as number ( $10^5$ microspheres/L).                                                                                                                                                                                  | 1     |
| Experimental Design                                |                                                                                                                                                                                                                                                                        | Score |
| 6. Chemical purity                                 | MPs have not been subjected to any cleaning                                                                                                                                                                                                                            | 0     |
| 7. laboratory preparation/                         | To minimize possible NPs contamination during the manipulation and test exposure, all the instruments were previously washed with Milli-Q® water. Glass materials were also used to perform the test and keep the all work solutions. Cotton lab coats were also used. | 2     |
| 8 verification of contamination                    | Background contamination was checked visually and was not detected.                                                                                                                                                                                                    | 1     |
| 9. verification of exposure                        | The work concentration ( $10^5$ pcs/L) was maintained by changing the water every 24 h.                                                                                                                                                                                | 1     |
| 10. homogeneity of exposure                        | Homogeneous particle distribution was ensured by daily water changes and intensive aeration.                                                                                                                                                                           | 1     |
| 11. exposure assessment                            | The location of MPs inside the body of the molluscs has not been considered.                                                                                                                                                                                           | 0     |
| 12. replication                                    | Minimum three replicates for statistical rigor were performed for bioassays and characterization measures.                                                                                                                                                             | 2     |
| <b>Applicability in ecological risk assessment</b> |                                                                                                                                                                                                                                                                        |       |
| Applicable for Risk Assessment                     |                                                                                                                                                                                                                                                                        | Score |
| 13. endpoints                                      | Several biochemical endpoints have been considered. Including DNA damage, changes in lysosome stability and indicators of oxidative stress.                                                                                                                            | 1     |
| 14. presence of natural (food) particles           | During experiment the mussels were not fed.                                                                                                                                                                                                                            | 0     |
| 15-16. reporting of effect thresholds              | Dose-response relationships were not investigated in this article                                                                                                                                                                                                      | 0     |

|                                           |                                                          |       |
|-------------------------------------------|----------------------------------------------------------|-------|
| and quality of dose-response relationship |                                                          |       |
| Ecological Relevance                      |                                                          | Score |
| 17. concentration range tested            | Only one concentration of MPs has been used.             | 0     |
| 18. aging and biofouling                  | MPs has not been aged in this article                    | 0     |
| 19. diversity of NPs tested               | Only one type of polymer with one size range was tested. | 0     |
| 20. exposure time                         | The exposure time was 5-d.                               | 0     |
| Total Score                               |                                                          | 17    |

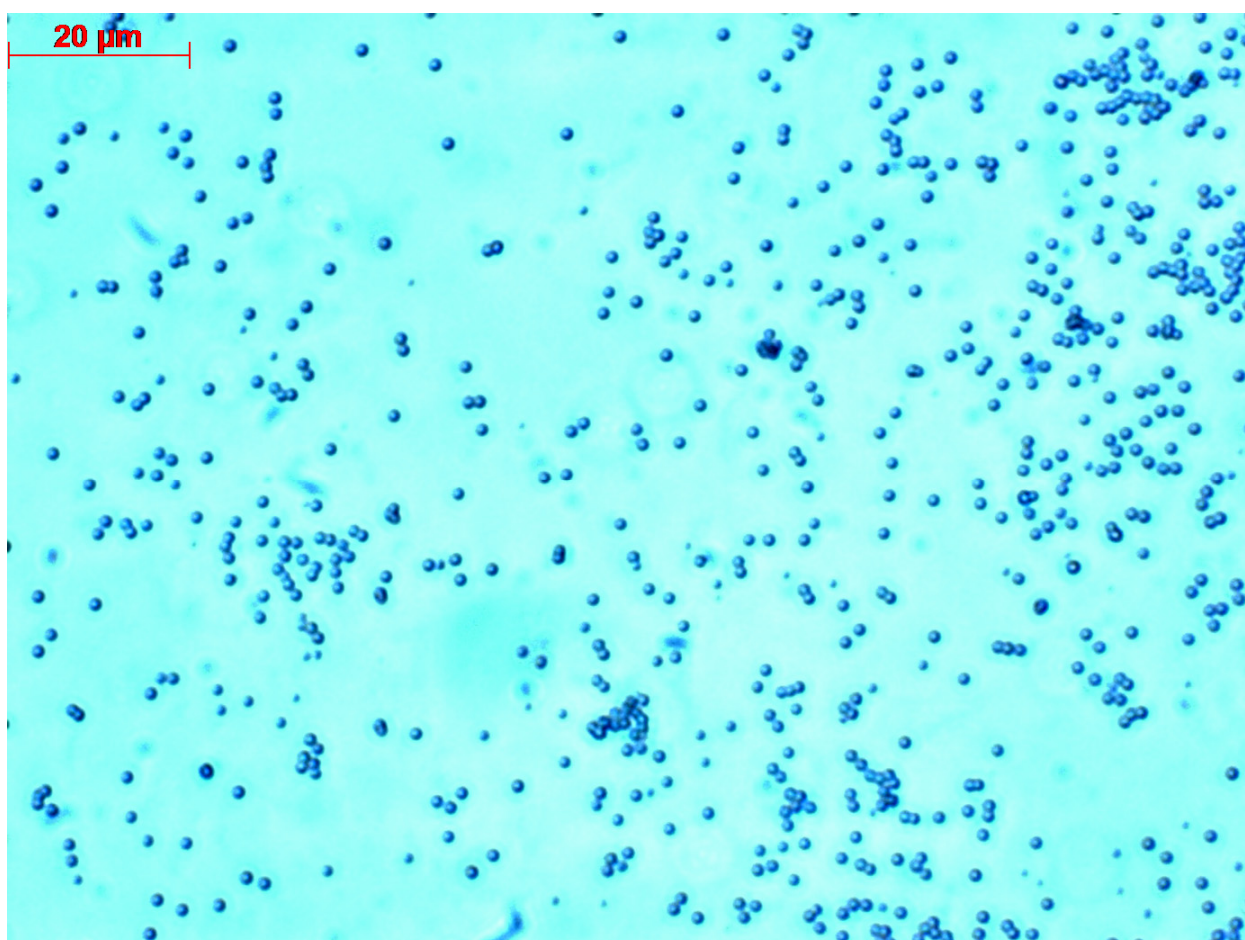

**Figure S1.** Photo of used PS MPs.

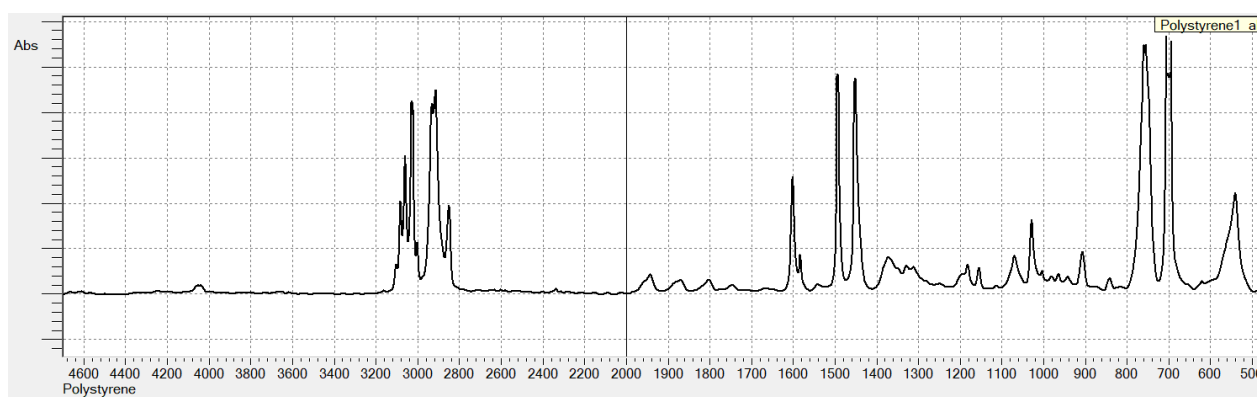

**Figure S2.** Spectra of used PS MPs.
